# Supplementary material for: Antioxidants reveal an inverted U‐shaped dose‐response relationship between reactive oxygen species levels and the rate of aging in Caenorhabditis elegans
Source: PubMed Central journal article supplement (PMC5242296; doi:10.1111/acel.12528), 2016-09-28
Supplement: ACEL-16-104-s002.pdf [file ACEL-16-104-s002.pdf]

Figure S2

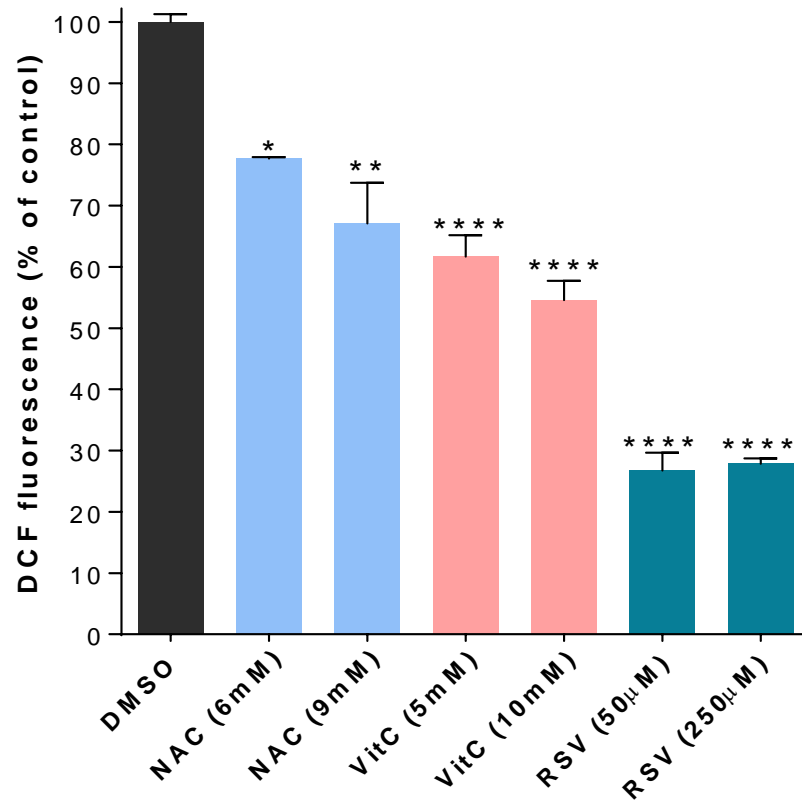

**Effect of different treatments on ROS levels.** Relative ROS levels in wild-type N2 worms after different treatments were measured using a the H2DCF-DA assay. NAC, N-Acetyl-Cysteine; VitC, vitamin C; RSV, resveratrol. Data are means  $\pm$  SEM (n = 3); \*p<0.05, \*\*p<0.01, \*\*\*\*p<0.0001 relative to DMSO-treated controls (one-way ANOVA followed by post hoc Dunnett's test).
