# Supplementary material for: Antioxidants reveal an inverted U‐shaped dose‐response relationship between reactive oxygen species levels and the rate of aging in Caenorhabditis elegans
Source: PubMed Central journal article supplement (PMC5242296; doi:10.1111/acel.12528), 2016-09-28
Supplement: ACEL-16-104-s003.pdf [file ACEL-16-104-s003.pdf]

TABLE S1

| Genotype / treatment                            | Number of repeats | Sample size (N) | Mean lifespan in days $\pm$ SEM | Maximum lifespan in days | P-value compared to control (t-test) | P-value compared to control (log rank test) |
|-------------------------------------------------|-------------------|-----------------|---------------------------------|--------------------------|--------------------------------------|---------------------------------------------|
| Wild-type / DMSO                                | 18                | N= 973          | 19.39 $\pm$ 0.09665             | 32                       |                                      |                                             |
| Wild-type / 50 $\mu$ M RSV                      | 17                | N= 978          | 20.66 $\pm$ 0.1131              | 38                       | P< 0.0001                            | P< 0.0001                                   |
| Wild-type / 250 $\mu$ M RSV                     | 18                | N= 1034         | 22.62 $\pm$ 0.1172              | 33                       | P< 0.0001                            | P< 0.0001                                   |
| Wild-type / DMSO                                | 4                 | N= 225          | 17.64 $\pm$ 0.1734              | 25                       |                                      |                                             |
| Wild-type / 3mM NAC                             | 4                 | N= 222          | 19.24 $\pm$ 0.2387              | 30                       | P< 0.0001                            | P< 0.0001                                   |
| Wild-type / 6mM NAC                             | 4                 | N= 226          | 19.85 $\pm$ 0.1754              | 28                       | P< 0.0001                            | P< 0.0001                                   |
| Wild-type / 9mM NAC                             | 4                 | N= 226          | 21.96 $\pm$ 0.3455              | 41                       | P< 0.0001                            | P< 0.0001                                   |
| Wild-type / DMSO                                | 5                 | N= 300          | 19.76 $\pm$ 0.1655              | 31                       |                                      |                                             |
| Wild-type / 5mM VitC                            | 3                 | N= 196          | 19.05 $\pm$ 0.1670              | 33                       | P= 0.0039                            | P= 0.0004                                   |
| Wild-type / 10mM VitC                           | 5                 | N= 303          | 19.61 $\pm$ 0.1556              | 27                       | ns                                   | ns                                          |
| Wild-type                                       | 8                 | N= 419          | 18.37 $\pm$ 0.1400              | 26                       |                                      |                                             |
| Wild-type / 0.1mM PQ                            | 8                 | N= 419          | 22.73 $\pm$ 0.1971              | 34                       | P< 0.0001                            | P< 0.0001                                   |
| Wild-type / 9mM NAC (- DMSO)                    | 2                 | N= 128          | 18.06 $\pm$ 0.1993              | 23                       |                                      |                                             |
| Wild-type / 9mM NAC (+ DMSO)                    | 2                 | N= 127          | 19.95 $\pm$ 0.2190              | 26                       | P< 0.0001                            | P< 0.0001                                   |
| bus-8 (e2698) / DMSO                            | 4                 | N= 249          | 20.57 $\pm$ 0.3028              | 35                       |                                      |                                             |
| bus-8 (e2698) / 50 $\mu$ M RSV                  | 4                 | N= 176          | 20.17 $\pm$ 0.3915              | 42                       | ns                                   | ns                                          |
| bus-8 (e2698) / 250 $\mu$ M RSV                 | 4                 | N= 127          | 25.02 $\pm$ 0.5126              | 43                       | P< 0.0001                            | P< 0.0001                                   |
| bus-8 (e2698) / DMSO                            | 2                 | N= 121          | 22.40 $\pm$ 0.3692              | 33                       |                                      |                                             |
| bus-8 (e2698) / 3mM NAC                         | 2                 | N= 124          | 26.06 $\pm$ 0.4277              | 36                       | P< 0.0001                            | P< 0.0001                                   |
| bus-8 (e2698) / 6mM NAC                         | 2                 | N= 127          | 25.71 $\pm$ 0.4584              | 41                       | P< 0.0001                            | P< 0.0001                                   |
| bus-8 (e2698) / 9mM NAC                         | 2                 | N= 122          | 18.86 $\pm$ 0.5766              | 33                       | P< 0.0001                            | P= 0.0003                                   |
| bus-8 (e2698) / DMSO                            | 3                 | N= 204          | 19.34 $\pm$ 0.2995              | 33                       |                                      |                                             |
| bus-8 (e2698) / 5mM VitC                        | 3                 | N= 203          | 24.22 $\pm$ 0.2436              | 34                       | P< 0.0001                            | P< 0.0001                                   |
| bus-8 (e2698) / 10mM VitC                       | 3                 | N= 206          | 22.60 $\pm$ 0.2540              | 33                       | P< 0.0001                            | P< 0.0001                                   |
| clk-1 (qm30) / DMSO                             | 2                 | N= 137          | 30.89 $\pm$ 0.3667              | 42                       |                                      |                                             |
| clk-1 (qm30) / 3mM NAC                          | 2                 | N= 135          | 35.06 $\pm$ 0.4479              | 52                       | P< 0.0001                            | P< 0.0001                                   |
| clk-1 (qm30) / 6mM NAC                          | 2                 | N= 130          | 39.55 $\pm$ 0.8035              | 59                       | P< 0.0001                            | P< 0.0001                                   |
| clk-1 (qm30) / 9mM NAC                          | 2                 | N= 132          | 23.78 $\pm$ 0.5244              | 39                       | P< 0.0001                            | P< 0.0001                                   |
| clk-1 (qm30); bus-8 (e2698) / DMSO              | 2                 | N= 136          | 26.82 $\pm$ 0.3084              | 41                       |                                      |                                             |
| clk-1 (qm30); bus-8 (e2698) / 3mM NAC           | 2                 | N= 135          | 32.39 $\pm$ 0.3795              | 46                       | P< 0.0001                            | P< 0.0001                                   |
| clk-1 (qm30); bus-8 (e2698) / 6mM NAC           | 2                 | N= 131          | 29.36 $\pm$ 0.2759              | 39                       | P< 0.0001                            | P< 0.0001                                   |
| clk-1 (qm30); bus-8 (e2698) / 9mM NAC           | 2                 | N= 133          | 17.86 $\pm$ 0.6307              | 35                       | P< 0.0001                            | P< 0.0001                                   |
| isp-1 (qm150) / DMSO                            | 2                 | N= 127          | 37.25 $\pm$ 0.7328              | 59                       |                                      |                                             |
| isp-1 (qm150) / 3mM NAC                         | 2                 | N= 132          | 53.02 $\pm$ 1.067               | 83                       | P< 0.0001                            | P< 0.0001                                   |
| isp-1 (qm150) / 6mM NAC                         | 2                 | N= 132          | 48.81 $\pm$ 0.8773              | 72                       | P< 0.0001                            | P< 0.0001                                   |
| isp-1 (qm150) / 9mM NAC                         | 2                 | N= 128          | 46.29 $\pm$ 1.065               | 81                       | P< 0.0001                            | P< 0.0001                                   |
| clk-1 (qm30) / DMSO                             | 3                 | N= 198          | 27.19 $\pm$ 0.3973              | 44                       |                                      |                                             |
| clk-1 (qm30) / 5mM VitC                         | 3                 | N= 203          | 32.08 $\pm$ 0.3387              | 45                       | P< 0.0001                            | P< 0.0001                                   |
| clk-1 (qm30) / 10mM VitC                        | 3                 | N= 205          | 30.57 $\pm$ 0.4721              | 49                       | P< 0.0001                            | P< 0.0001                                   |
| clk-1 (qm30); bus-8 (e2698) / DMSO              | 3                 | N= 205          | 28.34 $\pm$ 0.3902              | 45                       |                                      |                                             |
| clk-1 (qm30); bus-8 (e2698) / 5mM VitC          | 3                 | N= 194          | 28.58 $\pm$ 0.2123              | 35                       | ns                                   | ns                                          |
| clk-1 (qm30); bus-8 (e2698) / 10mM VitC         | 3                 | N= 203          | 25.17 $\pm$ 0.2679              | 35                       | P< 0.0001                            | P< 0.0001                                   |
| clk-1 (qm30) / DMSO                             | 4                 | N= 289          | 25.10 $\pm$ 0.3421              | 49                       |                                      |                                             |
| clk-1 (qm30) / 50 $\mu$ M RSV                   | 4                 | N= 227          | 24.03 $\pm$ 0.3299              | 42                       | P= 0.0275                            | P= 0.0259                                   |
| clk-1 (qm30) / 250 $\mu$ M RSV                  | 4                 | N= 226          | 23.29 $\pm$ 0.3510              | 44                       | P< 0.0001                            | P= 0.0009                                   |
| clk-1 (e2519) / DMSO                            | 6                 | N= 325          | 26.52 $\pm$ 0.2802              | 48                       |                                      |                                             |
| clk-1 (e2519) / 50 $\mu$ M RSV                  | 6                 | N= 329          | 25.41 $\pm$ 0.2770              | 44                       | P= 0.0049                            | P= 0.0126                                   |
| clk-1 (e2519) / 250 $\mu$ M RSV                 | 6                 | N= 330          | 22.96 $\pm$ 0.2923              | 42                       | P< 0.0001                            | P< 0.0001                                   |
| clk-1 (qm30); bus-8 (e2698) / DMSO              | 5                 | N= 305          | 27.73 $\pm$ 0.2513              | 42                       |                                      |                                             |
| clk-1 (qm30); bus-8 (e2698) / 50 $\mu$ M RSV    | 4                 | N= 250          | 23.32 $\pm$ 0.2356              | 43                       | P< 0.0001                            | P< 0.0001                                   |
| clk-1 (qm30); bus-8 (e2698) / 250 $\mu$ M RSV   | 3                 | N= 188          | 19.62 $\pm$ 0.3019              | 36                       | P< 0.0001                            | P< 0.0001                                   |
| isp-1 (qm150) / DMSO                            | 6                 | N= 316          | 33.78 $\pm$ 0.5878              | 65                       |                                      |                                             |
| isp-1 (qm150) / 50 $\mu$ M RSV                  | 6                 | N= 310          | 32.06 $\pm$ 0.6060              | 60                       | P= 0.0434                            | ns (P= 0.0773)                              |
| isp-1 (qm150) / 250 $\mu$ M RSV                 | 6                 | N= 309          | 29.60 $\pm$ 0.6661              | 64                       | P< 0.0001                            | P= 0.0011                                   |
| nuo-6 (qm200) / DMSO                            | 5                 | N= 246          | 37.18 $\pm$ 0.6195              | 65                       |                                      |                                             |
| nuo-6 (qm200) / 50 $\mu$ M RSV                  | 5                 | N= 249          | 29.33 $\pm$ 0.5940              | 65                       | P< 0.0001                            | P< 0.0001                                   |
| nuo-6 (qm200) / 250 $\mu$ M RSV                 | 5                 | N= 253          | 33.31 $\pm$ 0.6151              | 62                       | P< 0.0001                            | P= 0.0009                                   |
| gas-1 (fc21) / DMSO                             | 2                 | N= 112          | 20.40 $\pm$ 0.4161              | 33                       |                                      |                                             |
| gas-1 (fc21) / 50 $\mu$ M RSV                   | 2                 | N= 115          | 17.26 $\pm$ 0.2720              | 26                       | P< 0.0001                            | P< 0.0001                                   |
| gas-1 (fc21) / 250 $\mu$ M RSV                  | 2                 | N= 115          | 19.23 $\pm$ 0.3550              | 28                       | P= 0.0323                            | P= 0.0237                                   |
| isp-1 (qm150); bus-8 (e2698) / DMSO             | 3                 | N= 194          | 30.98 $\pm$ 0.6813              | 60                       |                                      |                                             |
| isp-1 (qm150); bus-8 (e2698) / 50 $\mu$ M RSV   | 2                 | N= 132          | 32.45 $\pm$ 0.7793              | 55                       | ns                                   | ns                                          |
| isp-1 (qm150); bus-8 (e2698) / 250 $\mu$ M RSV  | 2                 | N= 136          | 28.43 $\pm$ 0.6512              | 48                       | P= 0.0093                            | P= 0.0009                                   |
| gas-1 (kn1)                                     | 2                 | N= 129          | 25.88 $\pm$ 0.5326              | 44                       |                                      |                                             |
| gas-1 (kn1) / 0.1mM PQ                          | 2                 | N= 125          | 32.53 $\pm$ 0.6764              | 54                       | P< 0.0001                            | P< 0.0001                                   |
| sod-12345 / DMSO                                | 4                 | N= 200          | 16.66 $\pm$ 0.1120              | 22                       |                                      |                                             |
| sod-12345 / 50 $\mu$ M RSV                      | 4                 | N= 200          | 17.04 $\pm$ 0.1365              | 24                       | P= 0.0282                            | P= 0.0168                                   |
| sod-12345 / 250 $\mu$ M RSV                     | 4                 | N= 200          | 21.71 $\pm$ 0.1797              | 30                       | P< 0.0001                            | P< 0.0001                                   |
| sod-12345 / DMSO                                | 2                 | N= 100          | 16.90 $\pm$ 0.1446              | 22                       |                                      |                                             |
| sod-12345 / 10mM VitC                           | 2                 | N= 100          | 22.30 $\pm$ 0.2259              | 28                       | P< 0.0001                            | P< 0.0001                                   |
| sod-12345 / DMSO                                | 2                 | N= 100          | 16.66 $\pm$ 0.1810              | 22                       |                                      |                                             |
| sod-12345 / 3mM NAC                             | 2                 | N= 100          | 19.84 $\pm$ 0.2214              | 30                       | P< 0.0001                            | P< 0.0001                                   |
| sod-12345 / 6mM NAC                             | 2                 | N= 100          | 20.82 $\pm$ 0.2052              | 28                       | P< 0.0001                            | P< 0.0001                                   |
| sod-12345 / 9mM NAC                             | 2                 | N= 100          | 21.84 $\pm$ 0.2936              | 30                       | P< 0.0001                            | P< 0.0001                                   |
| sod-2 (ok1030); sod-3 (tm760) / DMSO            | 3                 | N= 149          | 19.80 $\pm$ 0.3439              | 32                       |                                      |                                             |
| sod-2 (ok1030); sod-3 (tm760) / 50 $\mu$ M RSV  | 3                 | N= 150          | 21.11 $\pm$ 0.3716              | 34                       | P= 0.0103                            | P= 0.0138                                   |
| sod-2 (ok1030); sod-3 (tm760) / 250 $\mu$ M RSV | 3                 | N= 144          | 22.83 $\pm$ 0.3526              | 38                       | P< 0.0001                            | P< 0.0001                                   |
| sod-2 (ok1030); sod-3 (tm760)                   | 2                 | N= 103          | 21.72 $\pm$ 0.3930              | 31                       |                                      |                                             |
| sod-2 (ok1030); sod-3 (tm760) / 0.1mM PQ        | 2                 | N= 102          | 20.12 $\pm$ 0.4259              | 34                       | P= 0.0062                            | P= 0.0071                                   |
| Wild-type / DMSO                                | 2                 | N= 130          | 17.38 $\pm$ 0.1438              | 24                       |                                      |                                             |
| Wild-type / 3mM NAC                             | 2                 | N= 130          | 19.78 $\pm$ 0.2081              | 27                       |                                      |                                             |
| Wild-type / 6mM NAC                             | 2                 | N= 130          | 19.75 $\pm$ 0.2450              | 28                       |                                      |                                             |
| Wild-type / 9mM NAC                             | 2                 | N= 127          | 21.98 $\pm$ 0.3630              | 38                       |                                      |                                             |
| Wild-type / 250 $\mu$ M RSV                     | 2                 | N= 129          | 20.47 $\pm$ 0.2293              | 30                       | P< 0.0001                            | P< 0.0001                                   |
| Wild-type / 3mM NAC + 250 $\mu$ M RSV           | 2                 | N= 136          | 21.40 $\pm$ 0.2392              | 31                       | P< 0.0001                            | P< 0.0001                                   |
| Wild-type / 6mM NAC + 250 $\mu$ M RSV           | 2                 | N= 128          | 21.75 $\pm$ 0.3196              | 37                       | P< 0.0001                            | P< 0.0001                                   |
| Wild-type / 9mM NAC + 250 $\mu$ M RSV           | 2                 | N= 130          | 25.58 $\pm$ 0.4747              | 41                       | P< 0.0001                            | P< 0.0001                                   |
| Wild-type / DMSO                                | 2                 | N= 100          | 23.59 $\pm$ 0.5426              | 34                       |                                      |                                             |
| Wild-type / 0.01mM PQ                           | 2                 | N= 100          | 25.03 $\pm$ 0.4563              | 34                       |                                      |                                             |
| Wild-type / 0.025mM PQ                          | 2                 | N= 99           | 26.46 $\pm$ 0.4570              | 35                       |                                      |                                             |
| Wild-type / 0.05mM PQ                           | 2                 | N= 100          | 28.09 $\pm$ 0.5211              | 39                       |                                      |                                             |
| Wild-type / 0.1mM PQ                            | 2                 | N= 50           | 30.62 $\pm$ 0.9458              | 43                       |                                      |                                             |
| Wild-type / 250 $\mu$ M RSV                     | 2                 | N= 100          | 26.40 $\pm$ 0.5580              | 38                       | P< 0.0001                            | P= 0.0002                                   |
| Wild-type / 0.01mM PQ + 250 $\mu$ M RSV         | 2                 | N= 100          | 25.97 $\pm$ 0.5254              | 36                       | ns                                   | P= 0.0403                                   |
| Wild-type / 0.025mM + 250 $\mu$ M RSV           | 2                 | N= 100          | 28.53 $\pm$ 0.4439              | 39                       | P= 0.0014                            | P= 0.0056                                   |
| Wild-type / 0.05mM + 250 $\mu$ M RSV            | 2                 | N= 101          | 30.76 $\pm$ 0.5592              | 43                       | P< 0.0001                            | P= 0.0001                                   |
| Wild-type / 0.1mM + 250 $\mu$ M RSV             | 2                 | N= 50           | 34.22 $\pm$ 0.9365              | 51                       | P= 0.0081                            | P= 0.0122                                   |
